# Supplementary material for: Basicity and Nucleophilicity Effect in Charge Transfer of ALH3-Base Adducts
Source: Research Square preprint supplement (doi:10.21203/rs.3.rs-1239201/v1), 2022-01-31
Supplement: Supplementary file 1 [file c935cb9eb7aac0a80cad963d.docx]

**GRAPHICAL ABSTRACT**
